# Supplementary material for: A platform for more sustainable chitin films from an ionic liquid process
Source: Royal Society of Chemistry journal article supplement (doi:10.1039/c6gc02201d), 2016-09-26
Supplement: c6gc02201d1.pdf [file c6gc02201d1.pdf]

## Electronic Supporting Information

### A platform for more sustainable chitin films from an ionic liquid process

Catherine King,<sup>a,c</sup> Julia L. Shamshina,<sup>b,c</sup> Gabriela Gurau,<sup>b,c</sup> Paula Berton,<sup>c</sup>

Nur Farahnadiyah Abdul Faruk Khan,<sup>b</sup> and Robin D. Rogers<sup>a,c,\*</sup>

---

<sup>a</sup> Department of Chemistry, The University of Alabama, Tuscaloosa, AL 35487, USA

<sup>b</sup> 525 Solutions, Inc., 720 2nd Street, Tuscaloosa, AL 35401, USA

<sup>c</sup> Department of Chemistry, McGill University, 801 Sherbrooke St. West, Montreal, QC H3A 0B8 Canada

## FTIR

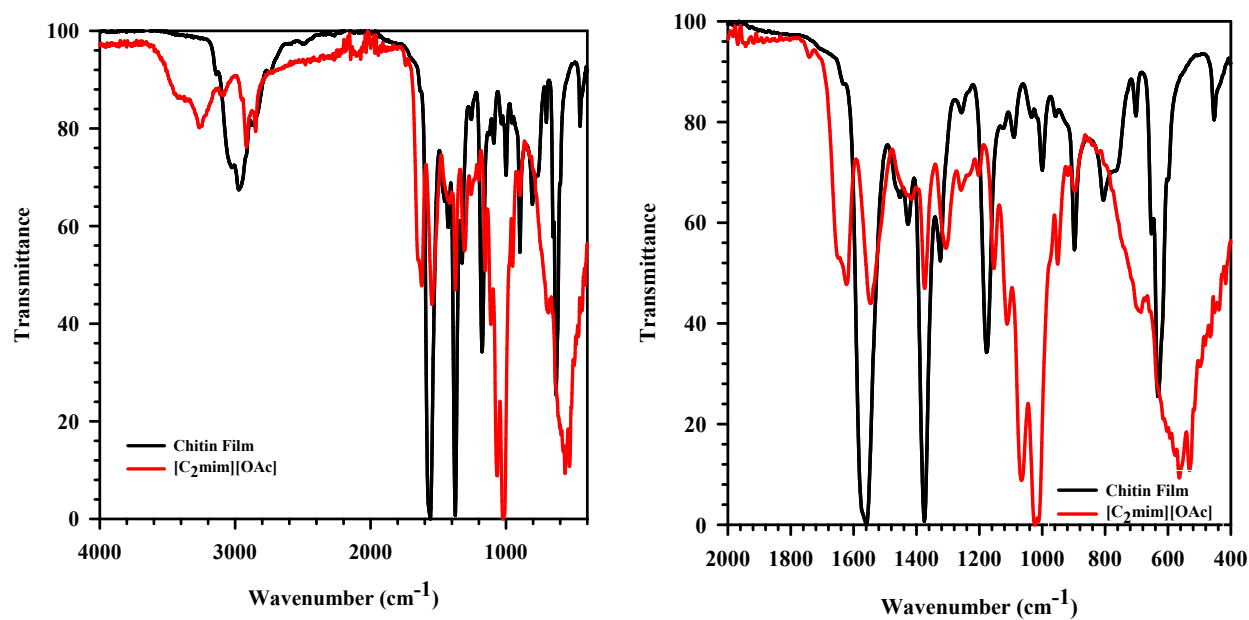

**Figure S1.** FTIR spectra of chitin film (red) and [C<sub>2</sub>mim][OAc] (black), the full spectrum is on the left, and 2000-400 cm<sup>-1</sup> is on the right.

## Thermogravimetric analysis (TGA)

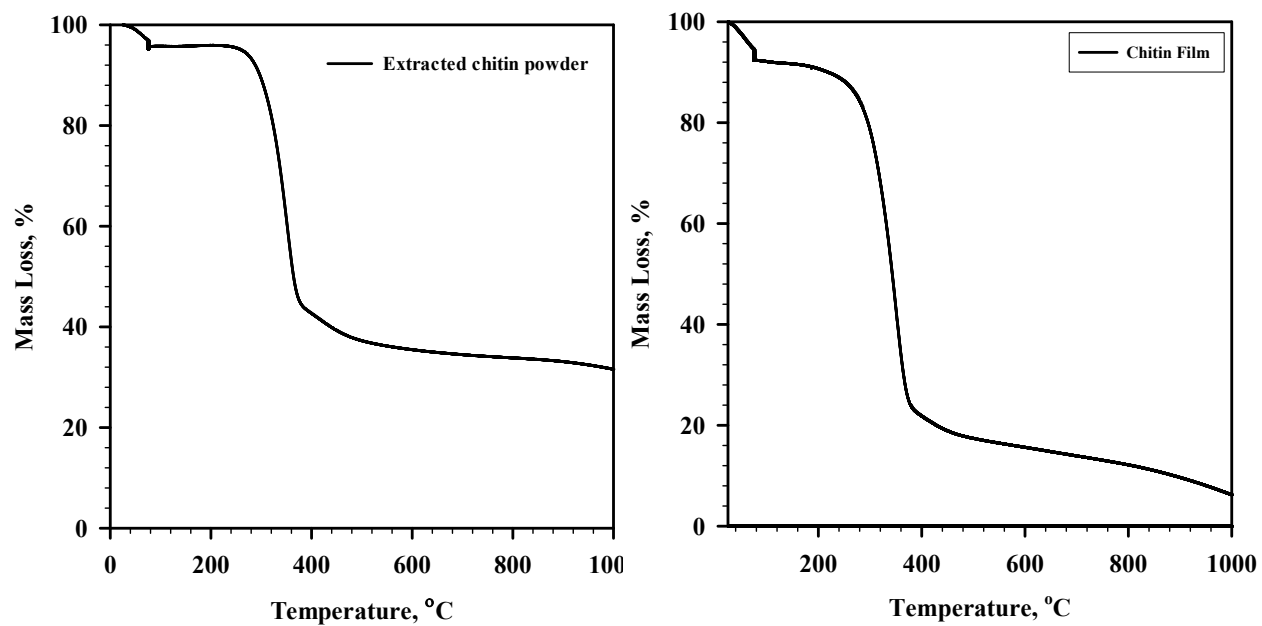

**Figure S2.** TGA data for extracted chitin and press dried chitin film.

## Tensile Strength

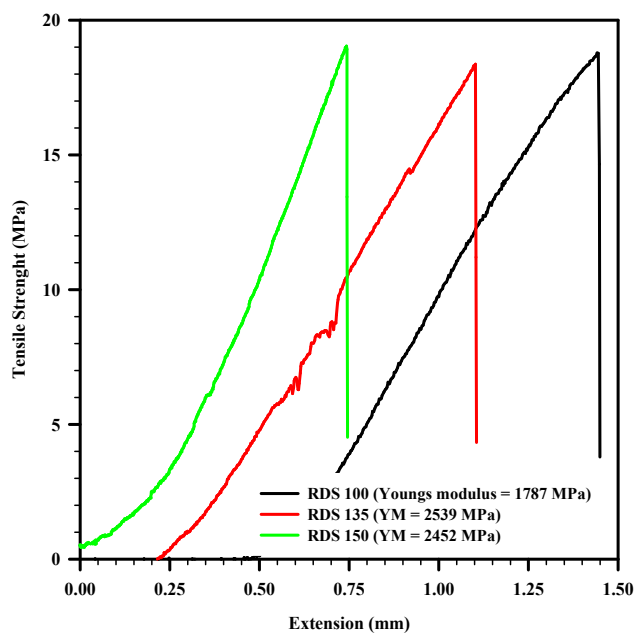

**Figure S3.** Representative tensile curves for press dried chitin films (RDS 100, 135, and 150).

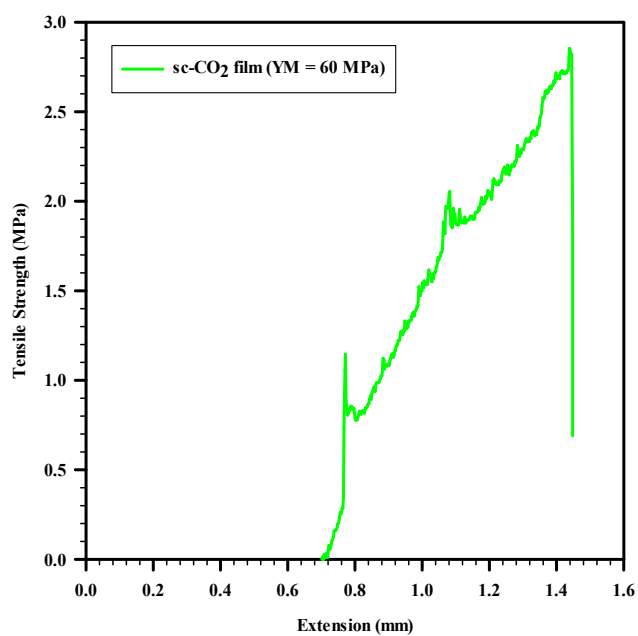

**Figure S4.** Representative tensile curve for RDS 135 sc-CO<sub>2</sub> dried film.

## Nuclear Magnetic Resonance Spectra $^1\text{H}$ NMR (500 MHz, $\text{DMSO}-d_6$ ).

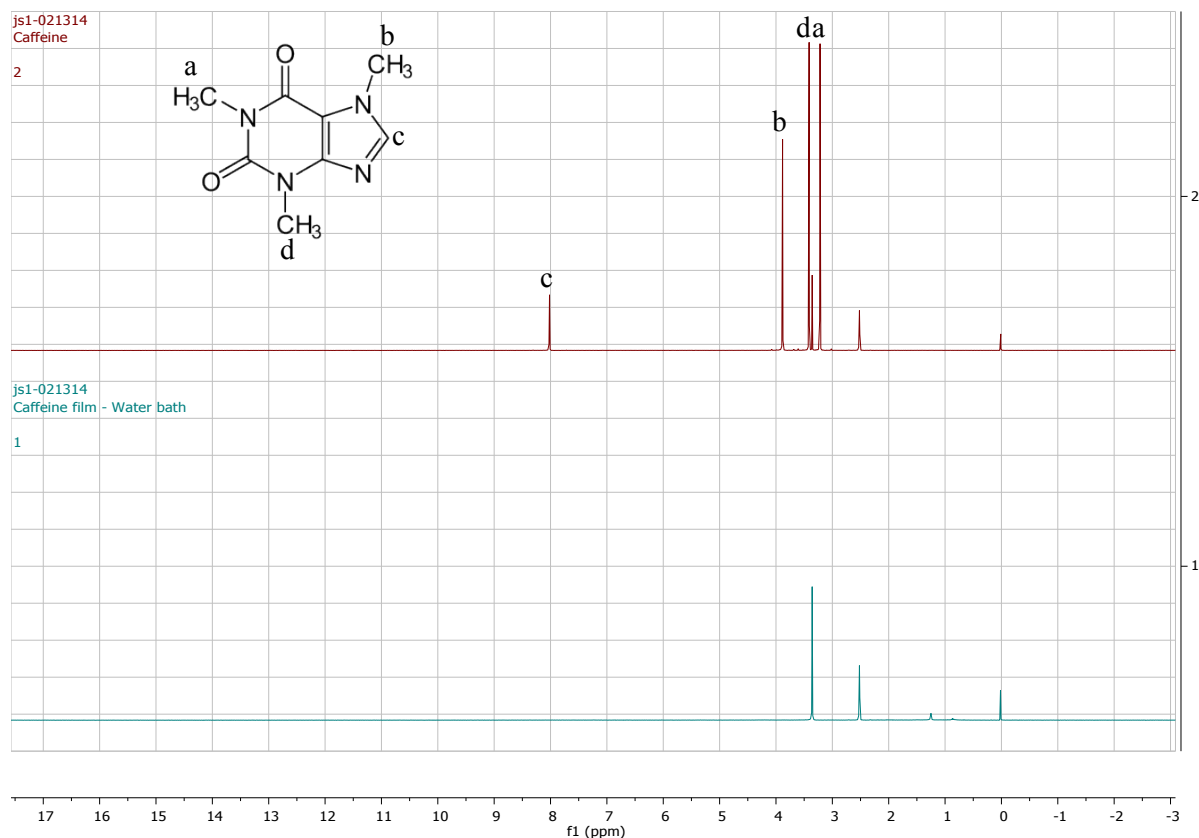

**Figure S5.**  $^1\text{H}$  NMR (500 MHz,  $\text{DMSO}-d_6$ ) for caffeine (top), and  $^1\text{H}$  NMR (500 MHz,  $\text{DMSO}-d_6$ ) for the solution of the washed film.

The chitin film was loaded with caffeine (as described in section 3.9 **Drug Loading and Release** of the main manuscript) and then quickly rinsed with water to remove caffeine from the surface. To check if any caffeine was still present in the film, 5 mg of film was cut and ground with a mortar and pestle. The ground material was then placed into a 2 mL vial fitted with a small stir bar and 1 mL of  $\text{DMSO}-d_6$  was added. The solution was left to stir overnight at room temperature, then filtered using a PTFE syringe filter (13 mm diameter and 0.45  $\mu\text{m}$  pore size, VWR, Radnor, PA, USA) to remove the chitin. The  $^1\text{H}$  NMR of the solution was recorded and the spectrum was compared with the  $^1\text{H}$  NMR spectrum of pure caffeine in  $\text{DMSO}-d_6$ .
